# Supplementary material
Source: Royal Society of Chemistry journal article supplement (doi:10.1039/d5ta10576e)
Supplement: d5ta10576e1.pdf [file d5ta10576e1.pdf]

## Boosting Triboelectric Charge Generation Using High-Performance Functional MAX phase Nanofillers Incorporated in Silicone Elastomers

Shailendra Kumar<sup>1</sup>, Rajesh Kumar Jha<sup>1,2\*</sup>, Ujjwal Chitnis<sup>1</sup>, and Ankur Goswami<sup>1\*</sup>

<sup>1</sup>Department of Materials Science and Engineering, Indian Institute of Technology Delhi, Hauz Khas New Delhi-110016, India

<sup>2</sup>Department of Electronics and Communication Engineering, Faculty of Science and Technology (ICFAI Tech), ICFAI Foundation for Higher Education, Hyderabad, Telangana, India, 501203

\*Corresponding author (E-mail: rajeshjha@ifheindia.org, agoswami@mse.iitd.ac.in)

### Supplementary Information

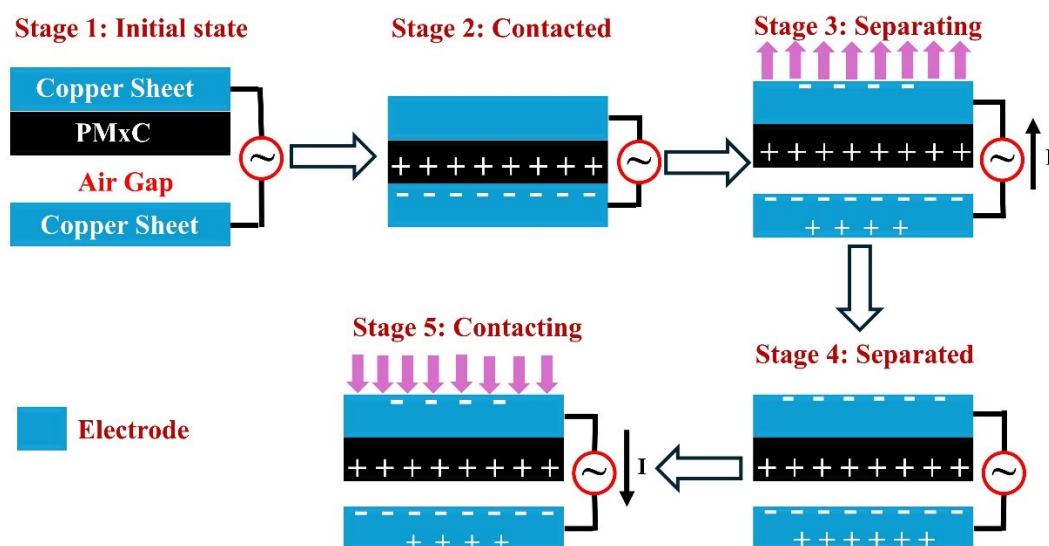

Figure S1: Working mechanism of TENG.

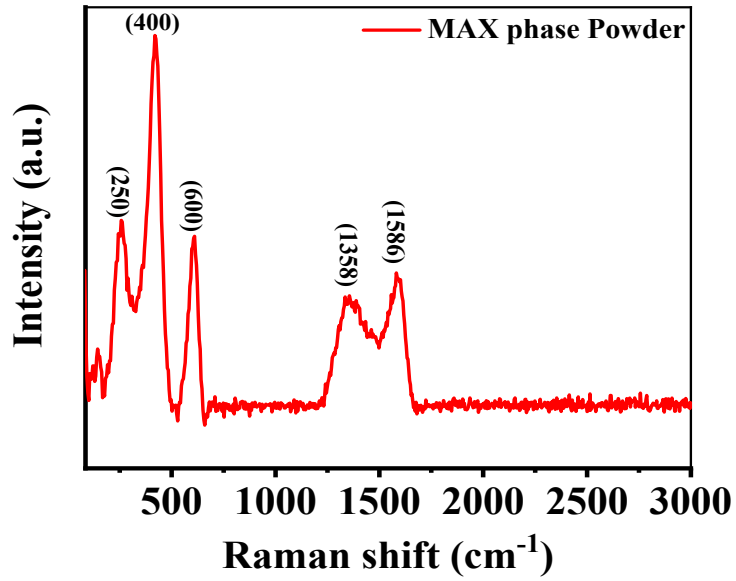

**Figure S2:** Raman Spectra of pure MAX phase powder.

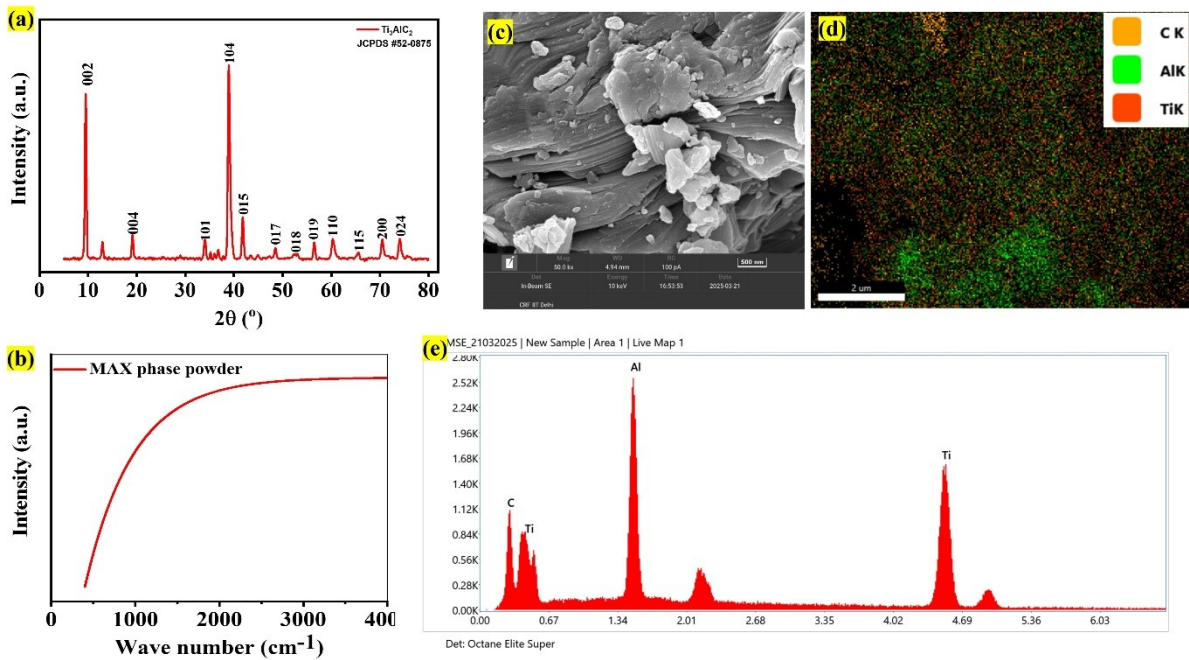

**Figure S3:** MAX phase powder characterization (a) x-ray diffraction, (b) FT-IR, (c) FESEM image, (d) mapping of elemental components, and (e) EDX.

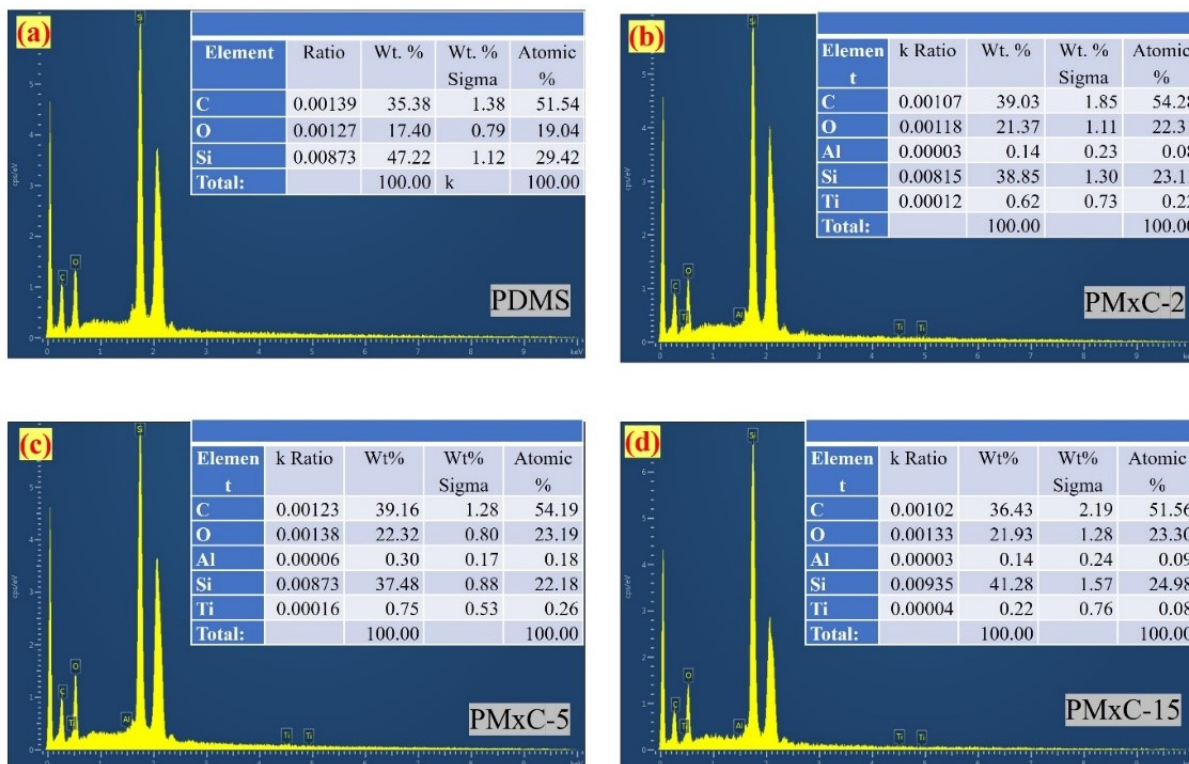

**Figure S4:** EDX of (a) Pure PDMS, (b) PMxC-2, (c) PMxC-5, and (d) PMxC-15.

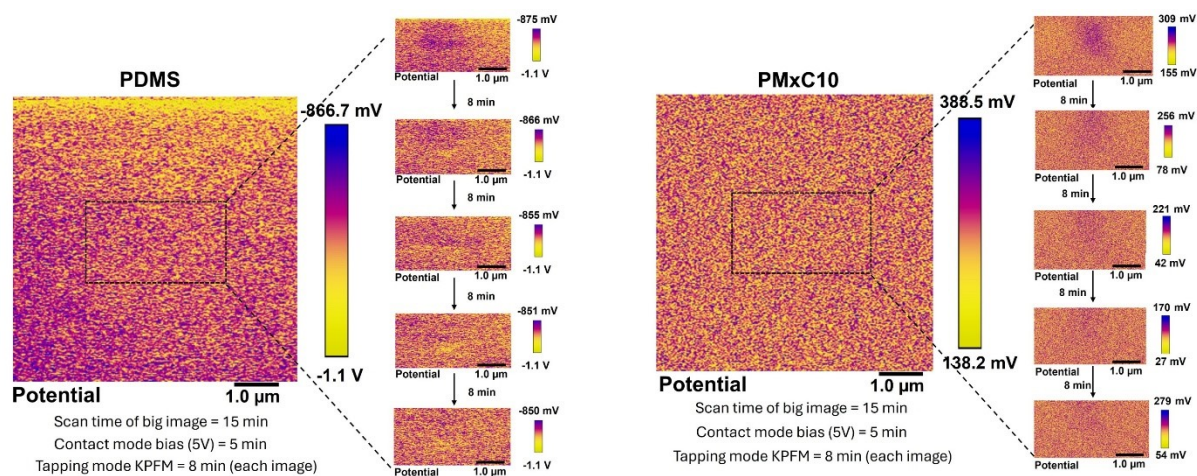

**Figure S5:** surface potential evolution of pristine PDMS and the PMxC-10 membrane measured during the charging interval.

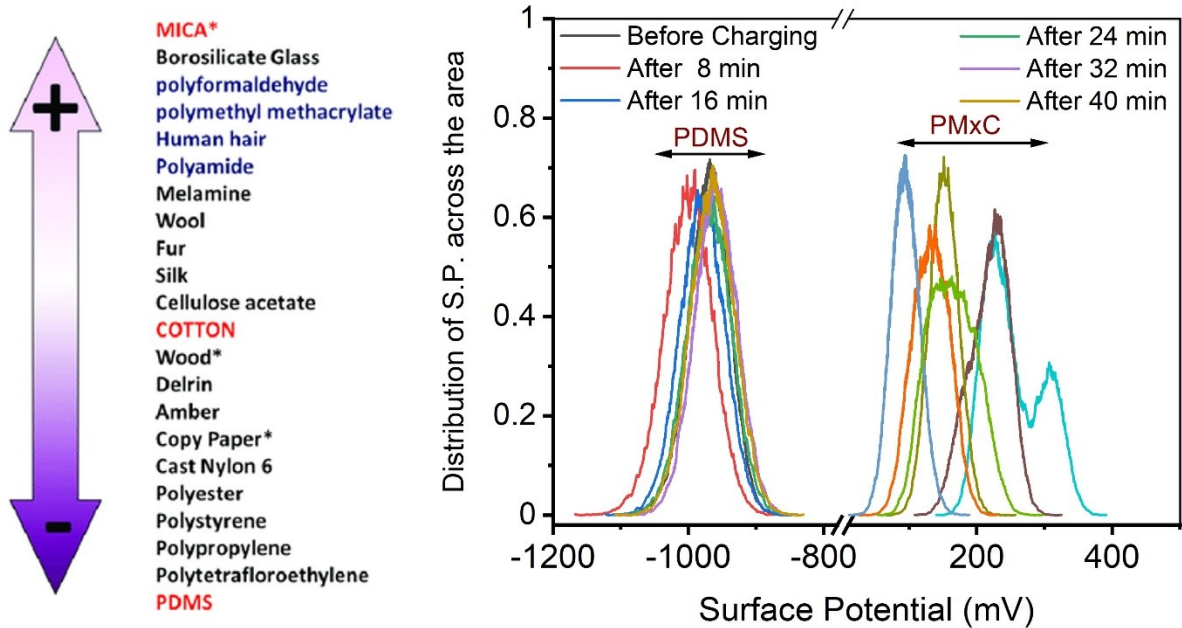

**Figure S6:** (a) Comparison of materials in the triboelectric series, and (b) surface potential evolution of pristine PDMS and the PMxC-10 membrane measured during the charging interval.

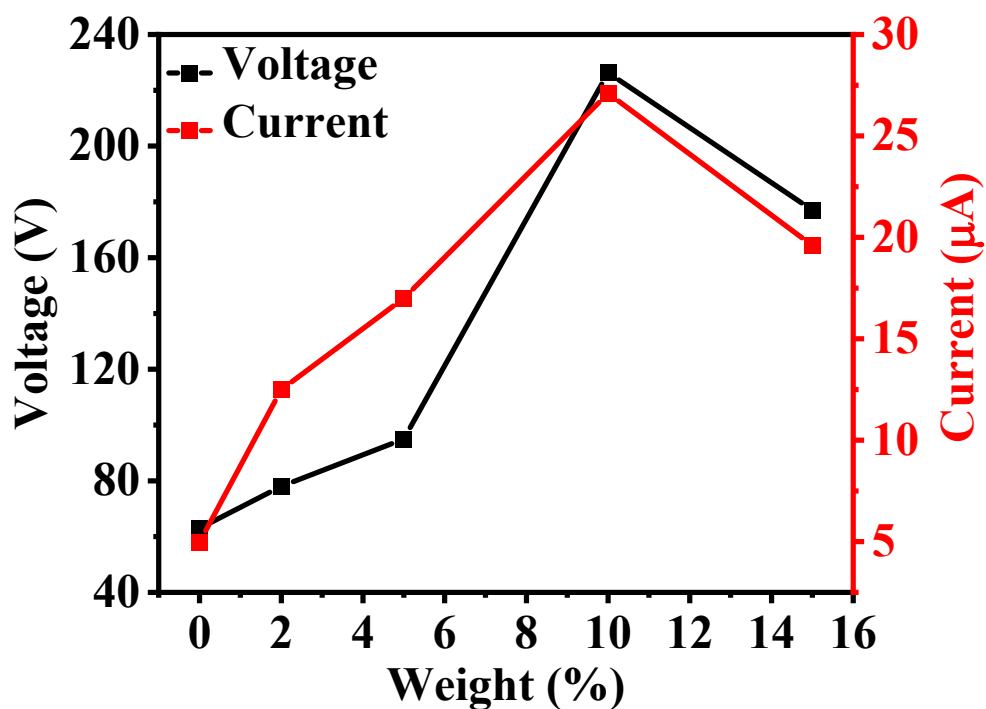

**Figure S7:** Output Voltage and current at different weight percentages of MAX phase.

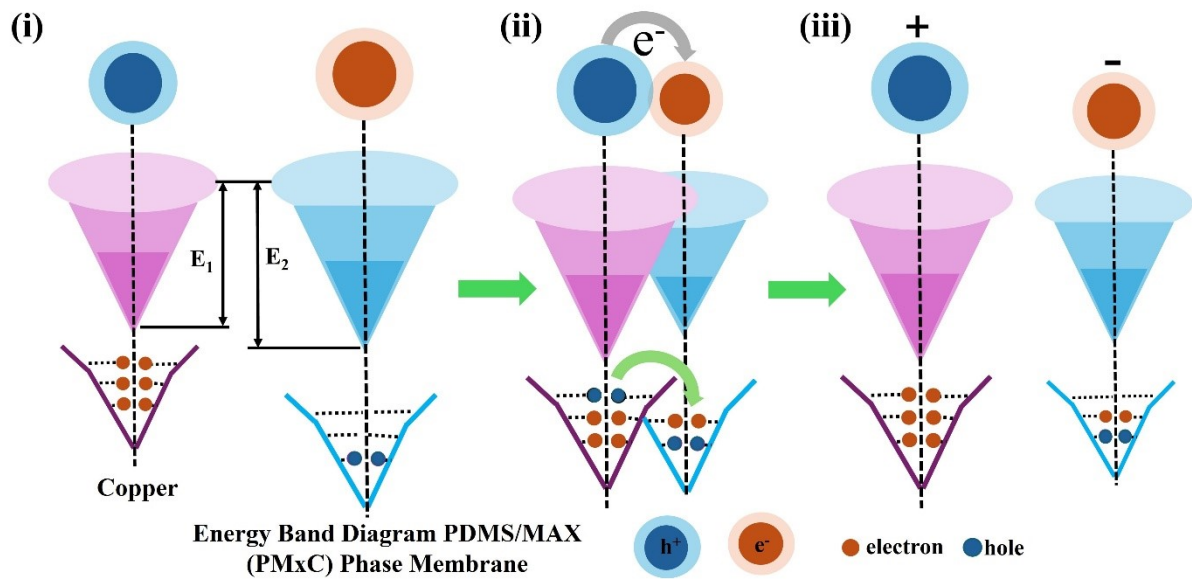

**Figure S8:** Charge transfer between PDMS and MAX phase.

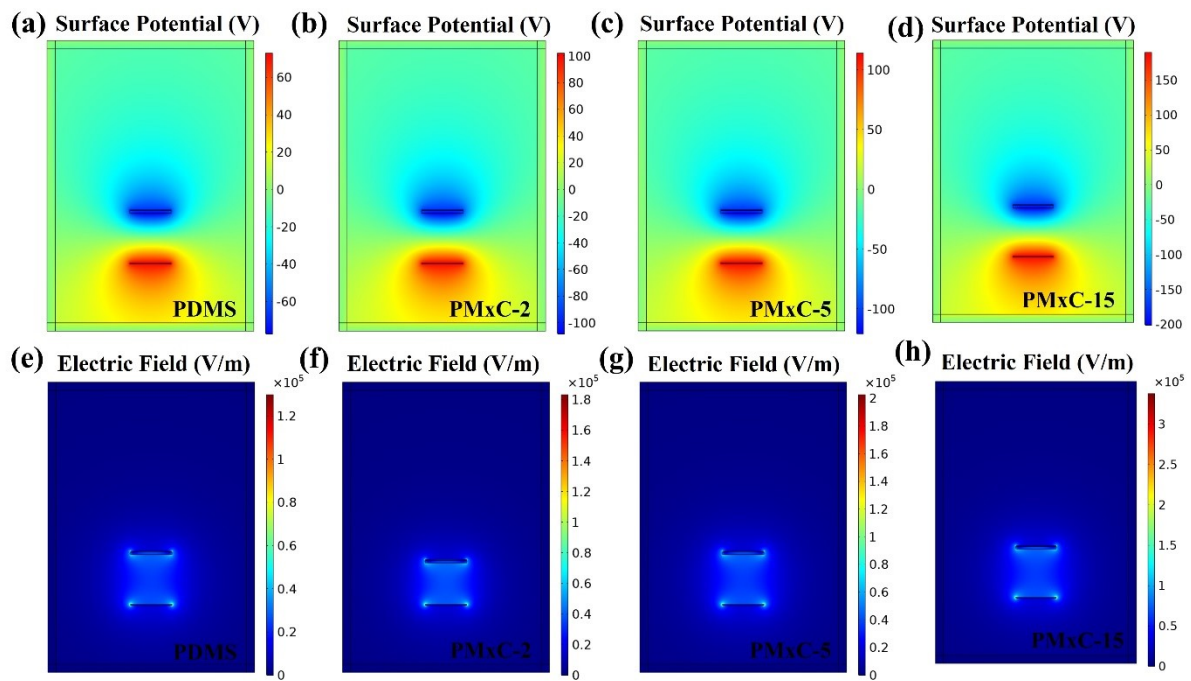

**Figure S9:** COMSOL simulation for CS mode TENG considering composite configuration of Surface Potential Difference (a-d) and Electric Field considering minimum to maximum separation distance between two dielectric layers (e-h).

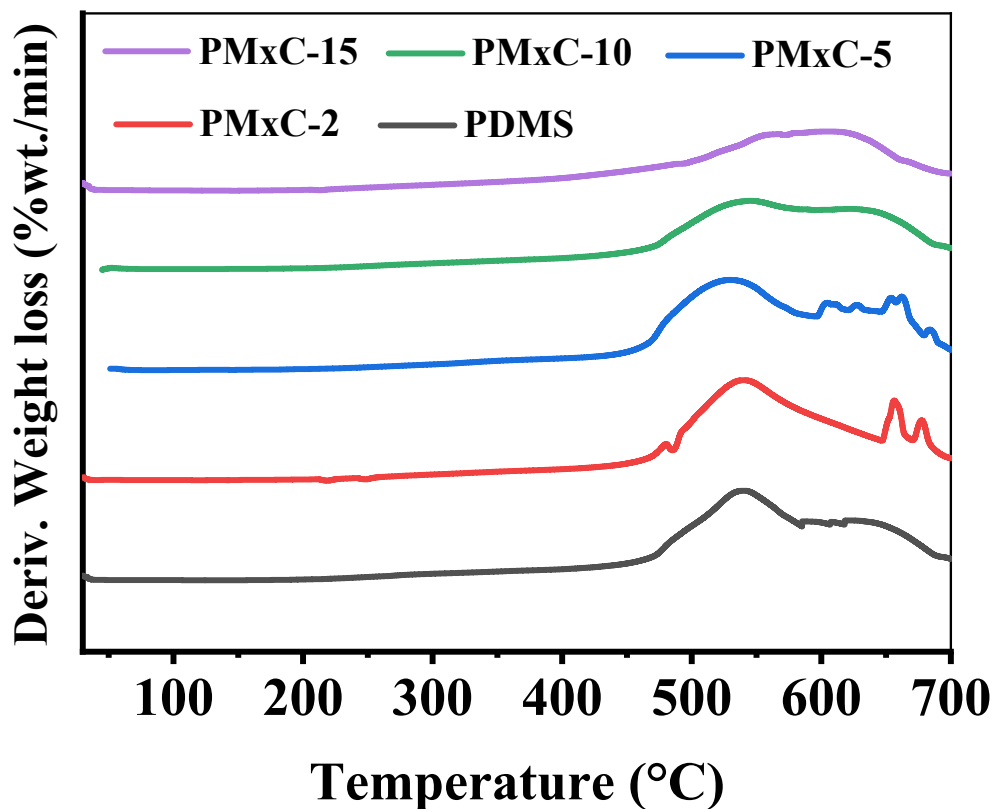

Figure S10: DTG characterization of composite membranes.
